# Supplementary material for: Process evaluation of a pragmatic implementation trial to support self-management for the prevention and management of type 2 diabetes in Uganda, South Africa and Sweden in the SMART2D project
Source: HighWire-hosted journal article supplement (doi:10.1136/bmjdrc-2022-002902), 2022-09-01
Supplement: bmjdrc-2022-002902supp001_data_supplement.pdf [file bmjdrc-2022-002902supp001_data_supplement.pdf]

**WebAnnexes****Webannex 1a) Peer group checklist (Uganda)**

|                                           |                                       |                                       |                                     |
|-------------------------------------------|---------------------------------------|---------------------------------------|-------------------------------------|
|                                           |                                       |                                       |                                     |
| Country                                   |                                       |                                       |                                     |
| Group ID                                  |                                       |                                       |                                     |
| Date of meeting                           |                                       |                                       |                                     |
| Meeting number / All meetings             | ____ / ____                           |                                       |                                     |
| Attendance:                               |                                       |                                       |                                     |
| Number of participants allocated to group | _____                                 |                                       |                                     |
| Number of participants present            | _____                                 |                                       |                                     |
| Number of Care companions present         | _____                                 |                                       |                                     |
| Duration:                                 |                                       |                                       |                                     |
| Starting time                             | _____                                 |                                       |                                     |
| Ending time                               | _____                                 |                                       |                                     |
| Content:                                  |                                       |                                       |                                     |
| Meeting topic:                            | _____                                 |                                       |                                     |
| Content covered:                          | <input type="checkbox"/> Fully        | <input type="checkbox"/> Partly       | <input type="checkbox"/> Not at all |
| Process:                                  |                                       |                                       |                                     |
| Utilization of participatory activities*  | <input type="checkbox"/> All the time | <input type="checkbox"/> Sometimes    | <input type="checkbox"/> Not at all |
| Identification of strengths**             | <input type="checkbox"/> For every pt | <input type="checkbox"/> For some pts | <input type="checkbox"/> Not at all |
| Goal setting for individuals              | <input type="checkbox"/> For every pt | <input type="checkbox"/> For some pts | <input type="checkbox"/> Not at all |
| Goal setting for group                    | <input type="checkbox"/> Yes          | <input type="checkbox"/> No           |                                     |

**Webannex 1b) Quality Assurance/Supervision Checklist for Peer Meeting (South Africa)**

[To be administered by a member of the SMART2D team] Team member \_\_\_\_\_

|                                                       |                                                                                                    |                                   |                                  |                                |                                         |
|-------------------------------------------------------|----------------------------------------------------------------------------------------------------|-----------------------------------|----------------------------------|--------------------------------|-----------------------------------------|
| <b>A. Identification</b>                              |                                                                                                    |                                   |                                  |                                |                                         |
| Group ID:                                             |                                                                                                    |                                   |                                  |                                |                                         |
| Date of meeting:                                      |                                                                                                    |                                   |                                  |                                |                                         |
| Meeting Number                                        |                                                                                                    |                                   |                                  |                                |                                         |
| <b>B. Attendance</b>                                  |                                                                                                    |                                   |                                  |                                |                                         |
| Number of participants expected to attend             |                                                                                                    |                                   |                                  |                                |                                         |
| Number of participants present                        |                                                                                                    |                                   |                                  |                                |                                         |
| Number of CHWs present                                |                                                                                                    |                                   |                                  |                                |                                         |
| Starting time                                         |                                                                                                    |                                   |                                  |                                |                                         |
| Ending time                                           |                                                                                                    |                                   |                                  |                                |                                         |
| <b>C. Content</b>                                     |                                                                                                    |                                   |                                  |                                |                                         |
| Meeting topic:                                        |                                                                                                    |                                   |                                  |                                |                                         |
| Content covered:                                      | <input type="checkbox"/> Fully <input type="checkbox"/> Partly <input type="checkbox"/> Not at all |                                   |                                  |                                |                                         |
| <b>D. Process</b>                                     |                                                                                                    |                                   |                                  |                                |                                         |
| i. Some group activities are participatory*           | <input type="checkbox"/> Strongly disagree                                                         | <input type="checkbox"/> Disagree | <input type="checkbox"/> Neutral | <input type="checkbox"/> Agree | <input type="checkbox"/> Strongly agree |
| ii. The strengths of each individual are identified** | <input type="checkbox"/> Strongly disagree                                                         | <input type="checkbox"/> Disagree | <input type="checkbox"/> Neutral | <input type="checkbox"/> Agree | <input type="checkbox"/> Strongly agree |
| iii. Individuals' goals are set                       | <input type="checkbox"/> Strongly disagree                                                         | <input type="checkbox"/> Disagree | <input type="checkbox"/> Neutral | <input type="checkbox"/> Agree | <input type="checkbox"/> Strongly agree |
| iv. Group goals are set                               | <input type="checkbox"/> Strongly disagree                                                         | <input type="checkbox"/> Disagree | <input type="checkbox"/> Neutral | <input type="checkbox"/> Agree | <input type="checkbox"/> Strongly agree |
| <b>E. Peer Group Leadership</b>                       |                                                                                                    |                                   |                                  |                                |                                         |
| i. PGL uses positive body language                    | <input type="checkbox"/> Strongly disagree                                                         | <input type="checkbox"/> Disagree | <input type="checkbox"/> Neutral | <input type="checkbox"/> Agree | <input type="checkbox"/> Strongly agree |
| ii. PGL is audible                                    | <input type="checkbox"/> Strongly disagree                                                         | <input type="checkbox"/> Disagree | <input type="checkbox"/> Neutral | <input type="checkbox"/> Agree | <input type="checkbox"/> Strongly agree |
| iii. PGL is knowledgeable about the content           | <input type="checkbox"/> Strongly disagree                                                         | <input type="checkbox"/> Disagree | <input type="checkbox"/> Neutral | <input type="checkbox"/> Agree | <input type="checkbox"/> Strongly agree |
| iv. PGL moderates all discussions                     | <input type="checkbox"/> Strongly disagree                                                         | <input type="checkbox"/> Disagree | <input type="checkbox"/> Neutral | <input type="checkbox"/> Agree | <input type="checkbox"/> Strongly agree |
| v. PGL empowers the members                           | <input type="checkbox"/> Strongly disagree                                                         | <input type="checkbox"/> Disagree | <input type="checkbox"/> Neutral | <input type="checkbox"/> Agree | <input type="checkbox"/> Strongly agree |

Pt / pts = participant, participants

\* Such as small group / paired discussions / PGL ensures that everyone gets to say something

\*\* Past healthy behavior, knowledge, other resources

Peer group observation: Rate on a scale of 0 [Not at all] – 10 [Yes] and comment

| Question                                                                    | Rate | Comments |
|-----------------------------------------------------------------------------|------|----------|
| Is the topic guide used to guide the peer group session?                    |      |          |
| Is there active participation in the peer group session?                    |      |          |
| Did the facilitator give participants the opportunity to share experiences? |      |          |
| Did the facilitator give participants the opportunity to ask questions?     |      |          |
| If so, did the facilitator handle the questions adequately?                 |      |          |
| Is the venue large enough to accommodate all participants?                  |      |          |

Overall comments .....

WEBANNEX PG2

**Webannex 1c) Quality Assurance & interaction checklist for facilitator led phone sessions (Sweden)**

|                                                                                |                                                                                                    |                                   |                                  |                                |                                         |
|--------------------------------------------------------------------------------|----------------------------------------------------------------------------------------------------|-----------------------------------|----------------------------------|--------------------------------|-----------------------------------------|
| Administered by: _____                                                         |                                                                                                    | Recordings to be attached _____   |                                  |                                |                                         |
| <b>Section 1. Identification</b>                                               |                                                                                                    |                                   |                                  |                                |                                         |
| ID#:                                                                           |                                                                                                    |                                   |                                  |                                |                                         |
| Date of recording:                                                             |                                                                                                    |                                   |                                  |                                |                                         |
| Date of session:                                                               |                                                                                                    |                                   |                                  |                                |                                         |
| <b>Section 2. Facilitator name</b>                                             |                                                                                                    |                                   |                                  |                                |                                         |
| Facilitator name:                                                              |                                                                                                    |                                   |                                  |                                |                                         |
| Starting time:                                                                 |                                                                                                    |                                   |                                  |                                |                                         |
| Ending time:                                                                   |                                                                                                    |                                   |                                  |                                |                                         |
| Total time of call:                                                            | _____ Minutes                                                                                      |                                   |                                  |                                |                                         |
| <b>Section 3. Content</b>                                                      |                                                                                                    |                                   |                                  |                                |                                         |
| Session nr:                                                                    |                                                                                                    |                                   |                                  |                                |                                         |
| Content covered:                                                               | <input type="checkbox"/> Fully <input type="checkbox"/> Partly <input type="checkbox"/> Not at all |                                   |                                  |                                |                                         |
| <b>Section 4. PARAS – Strength Based Behavioural Coaching</b>                  |                                                                                                    |                                   |                                  |                                |                                         |
| 1. The ft works with the pt to identify his/her strengths                      | <input type="checkbox"/> Strongly Disagree                                                         | <input type="checkbox"/> Disagree | <input type="checkbox"/> Neutral | <input type="checkbox"/> Agree | <input type="checkbox"/> Strongly agree |
| 2. The ft uses minimal response tokens (mm, etc)                               | <input type="checkbox"/> Strongly Disagree                                                         | <input type="checkbox"/> Disagree | <input type="checkbox"/> Neutral | <input type="checkbox"/> Agree | <input type="checkbox"/> Strongly agree |
| 3. The ft verbally reflects on pt talk                                         | <input type="checkbox"/> Strongly Disagree                                                         | <input type="checkbox"/> Disagree | <input type="checkbox"/> Neutral | <input type="checkbox"/> Agree | <input type="checkbox"/> Strongly agree |
| 4. The ft gives sufficient time for pt reflection and responses                | <input type="checkbox"/> Strongly disagree                                                         | <input type="checkbox"/> Disagree | <input type="checkbox"/> Neutral | <input type="checkbox"/> Agree | <input type="checkbox"/> Strongly Agree |
| 5. The ft summarises participant talk                                          | <input type="checkbox"/> Strongly disagree                                                         | <input type="checkbox"/> Disagree | <input type="checkbox"/> Neutral | <input type="checkbox"/> Agree | <input type="checkbox"/> Strongly agree |
| <b>Section 5. Ft/Pt interaction</b>                                            |                                                                                                    |                                   |                                  |                                |                                         |
| 1. The pt shows interest in the session                                        | <input type="checkbox"/> Strongly disagree                                                         | <input type="checkbox"/> Disagree | <input type="checkbox"/> Neutral | <input type="checkbox"/> Agree | <input type="checkbox"/> Strongly agree |
| 2. The pt engages with the ft during the discussion                            | <input type="checkbox"/> Strongly disagree                                                         | <input type="checkbox"/> Disagree | <input type="checkbox"/> Neutral | <input type="checkbox"/> Agree | <input type="checkbox"/> Strongly agree |
| 3. The ft moderates the session                                                | <input type="checkbox"/> Strongly disagree                                                         | <input type="checkbox"/> Disagree | <input type="checkbox"/> Neutral | <input type="checkbox"/> Agree | <input type="checkbox"/> Strongly agree |
| 4. The session holds a positive atmosphere                                     | <input type="checkbox"/> Strongly disagree                                                         | <input type="checkbox"/> Disagree | <input type="checkbox"/> Neutral | <input type="checkbox"/> Agree | <input type="checkbox"/> Strongly agree |
| 5. The pt voice opinions about the content of the session                      | <input type="checkbox"/> Strongly Disagree                                                         | <input type="checkbox"/> Disagree | <input type="checkbox"/> Neutral | <input type="checkbox"/> Agree | <input type="checkbox"/> Strongly Agree |
| 6. The pt shares experiences with the ft                                       | <input type="checkbox"/> Strongly Disagree                                                         | <input type="checkbox"/> Disagree | <input type="checkbox"/> Neutral | <input type="checkbox"/> Agree | <input type="checkbox"/> Strongly Agree |
| <b>Section 6. Delivery of intervention</b>                                     |                                                                                                    |                                   |                                  |                                |                                         |
| 1. The ft informed the pt about the content of the session                     | <input type="checkbox"/> Strongly disagree                                                         | <input type="checkbox"/> Disagree | <input type="checkbox"/> Neutral | <input type="checkbox"/> Agree | <input type="checkbox"/> Strongly agree |
| 2. The ft discussed the goals/ tasks from last session with the pt             | <input type="checkbox"/> Strongly disagree<br><input type="checkbox"/> Not applicable              | <input type="checkbox"/> Disagree | <input type="checkbox"/> Neutral | <input type="checkbox"/> Agree | <input type="checkbox"/> Strongly Agree |
| 3. The ft encouraged the pt to work on the session specific suggested tasks    | <input type="checkbox"/> Strongly disagree                                                         | <input type="checkbox"/> Disagree | <input type="checkbox"/> Neutral | <input type="checkbox"/> Agree | <input type="checkbox"/> Strongly Agree |
| 4. The ft encouraged the pt to set goals (with or without their "Hälsokompis") | <input type="checkbox"/> Strongly disagree                                                         | <input type="checkbox"/> Disagree | <input type="checkbox"/> Neutral | <input type="checkbox"/> Agree | <input type="checkbox"/> Strongly Agree |
| 5. The ft adapts his/her speech/language so the pt can understand              | <input type="checkbox"/> Strongly disagree                                                         | <input type="checkbox"/> Disagree | <input type="checkbox"/> Neutral | <input type="checkbox"/> Agree | <input type="checkbox"/> Strongly Agree |
| 6. The ft demonstrates knowledge pertaining to the content of the session      | <input type="checkbox"/> Strongly Disagree                                                         | <input type="checkbox"/> Disagree | <input type="checkbox"/> Neutral | <input type="checkbox"/> Agree | <input type="checkbox"/> Strongly Agree |
| 7. The ft used the session guide to conduct the session                        | <input type="checkbox"/> Strongly Disagree                                                         | <input type="checkbox"/> Disagree | <input type="checkbox"/> Neutral | <input type="checkbox"/> Agree | <input type="checkbox"/> Strongly Agree |
| 8. The ft shows acceptance to pt ideas and behaviour                           | <input type="checkbox"/> Strongly Disagree                                                         | <input type="checkbox"/> Disagree | <input type="checkbox"/> Neutral | <input type="checkbox"/> Agree | <input type="checkbox"/> Strongly Agree |
| 9. The ft gave the pt the opportunity to ask questions                         | <input type="checkbox"/> Strongly Disagree                                                         | <input type="checkbox"/> Disagree | <input type="checkbox"/> Neutral | <input type="checkbox"/> Agree | <input type="checkbox"/> Strongly Agree |

participant, Ft = facilitator

References: Absetz P. Elämäntapaohjauksen toteutustavan vaikutukset ja valintaa selittävät mekanismit. 2019;23–8.

WEBANNEX PG3

## Webannex 2. Care companion checklist (South Africa)

|              | SMART2D Home visits                       |
|--------------|-------------------------------------------|
| <b>name:</b> |                                           |
| <b>date</b>  | <b>notes:</b>                             |
|              | <b>general wellbeing:</b>                 |
|              |                                           |
|              |                                           |
|              | <b>goal setting and reviews</b>           |
|              | nutrition:                                |
|              | exercise :                                |
|              | medications (received, adherence )        |
|              | Facility appointments (met, barriers etc) |
|              | other (complications/other ailments )     |
|              | peer support group reminder:              |
|              | next CHW visit:                           |
| <b>date</b>  | <b>notes:</b>                             |
|              | <b>general wellbeing:</b>                 |
|              |                                           |
|              |                                           |
|              | <b>goal setting and reviews</b>           |
|              | nutrition:                                |
|              | exercise :                                |
|              | medications (received, adherence )        |
|              | Facility appointments (met, barriers etc) |
|              | other (complications/other ailments )     |
|              | peer support group reminder:              |
|              | next CHW visit:                           |
| <b>date</b>  | <b>notes:</b>                             |
|              | <b>general wellbeing:</b>                 |
|              |                                           |
|              |                                           |
|              | <b>goal setting and reviews</b>           |
|              | nutrition:                                |
|              | exercise :                                |
|              | medications (received, adherence )        |
|              | Facility appointments (met, barriers etc) |
|              | other (complications/other ailments )     |
|              | peer support group reminder:              |
|              | next CHW visit:                           |

Webannex 3) Facility checklist to document (changes in) context

|                                                     |                         |                             |          |
|-----------------------------------------------------|-------------------------|-----------------------------|----------|
| PROCESS TOOL 1: CARE CHECKLIST                      |                         |                             |          |
| Site ID:                                            |                         |                             |          |
| Cluster ID: (To be filled in by research personnel) |                         |                             |          |
| Evaluator (person to fill in list):                 |                         |                             |          |
| Date:                                               |                         |                             |          |
| S.NO:                                               | Question                | Check: present, functioning | Comments |
| 1.1: Basic Equipment                                |                         |                             |          |
| A                                                   | Glucometers & strips    |                             |          |
| B                                                   | HbA1C analyser & test   |                             |          |
| C                                                   | Weighing scales         |                             |          |
| D                                                   | Stadiometers            |                             |          |
| E                                                   | Measuring tapes         |                             |          |
| F                                                   | Blood pressure meter    |                             |          |
| 1.2: Guidelines                                     |                         |                             |          |
| A                                                   | Treatment guidelines    |                             |          |
| B                                                   | Taskshifting guidelines |                             |          |
| C                                                   | patient flowchart       |                             |          |
| 1.3: Register                                       |                         |                             |          |
| A                                                   | Patient register        |                             |          |
| B                                                   | Appointment diary       |                             |          |
| C                                                   | Patient contact form    |                             |          |
